# Supplementary material for: Role of ADAMTS13, von Willebrand factor cleaving protease, in liver ischemia-reperfusion injury: Proposal of hepatic thrombotic microangiopathy
Source: Preprints.org preprint supplement (doi:10.20944/preprints202401.2103.v1), 2024-01-30
Supplement: Supplementary file 3 [file supplemental table.xlsx]

## Sheet: Supple Table 1
			ADAMTS13 +/+	ADAMTS13 -/-
		AST (IU/L)	60.0 ± 10.0	52.4 ± 2.2	n.s.
		ALT (IU/L)	20.7 ± 5.7	27.6 ± 1.3	n.s.
		PLT (x104)	67.90 ± 4.0	69.9 ± 6.9	n.s.
		LDH (IU/L)	199.0 ± 19.1	193.0 ± 37.0	n.s.
		ADAMTS13 activity (%)	108.3 ± 6.2	3.8 ±1.4	p<0.0001
		PT (sec)	0.766 ±0.004	0.786 ± 0.007	n.s.
		APTT (sec)	23.8 ± 0.8	22.9 ± 0.9	n.s.
		PT (INR)	0.766 ± 0.004	0.786 ± 0.007	n.s.
		Supplemental Table 1. Pre-operative biochemical data between WT and ADAMTS13-null mice

## Sheet: Supple Table 2
	mouse
	TNF-a	5`-AGGGTCTGGGCCATAGAACT-3` (F) 5`-CCACCACGCTCTTCTGTCTAC-3` (R)
	IL-1β	5`-GGTCAAAGGTTTGGAAGCAG-3` (F) 5`-TGTGAAATGCCACCTTTTGA (R)
	IL-6	5`-ACCAGAGGAAATTTTCAATAGGC-3` (F) 5`-TGATGCACTTGCAGAAAACA-3` (R)
	IL-10	5`-TACCTGGTAGAAGTGATGCC-3` (F) 5`-CATCATGTATGCTTCTATGC-3` (R)
	CXCL-2 (MIP-2)	5`-TCCAGGTCAGTTAGCCTTGC-3` (F) 5`-CGGTCAAAAAGTTTGCCTTG-3` (R)
	CXCL-10 (IP10)	5`-CCTATGGCCCTCATTCTCAC-3` (F) 5`-CTCATCCTGCTGGGTCTGAG-3` (R)
	GAPDH	5`-TGTGTCCGTCGTGGATCTGA-3` (F) 5`-TTGCTGTTGAAGTCGCAGGAG-3` (R)
	ADAMTS13 (mRNA)	5`-TGTCTGCAAGTGCAGTGAGAGGCA-3` (F) 5`-AATGAAGATGGCACCAGTGAGGAT-3` (R)
	vWF	5`-CTTCCTGGAAAAGTGTTGGATCTC-3` (F) 5`-CTGGAATGTCTCATCTTGCTTCAG-3` (R)
	ADAMTS13 (genotype)	5`-ACCCTATCTCTGGCCTGTATTCCT-3` 5`-TACTGACTTGTGACCACAAGCCCT-3` 5`-ATCGAGTCTAGCTTGGCTGGACGT-3`
	Rat	Taqman gene expression assay ID
	TNF-a	Rn99999017_m1
	IL-1β	Rn00580432_m1
	IL-6	Rn01410330_m1
	Endothelin-1 (ET-1)	Rn00561129_m1
	β-actin	Rn00667869_m1
	Supplemental table 2. Primer sequences used for real-time quantitative PCR
